# Supplementary material for: A scoping review of waterborne and water-related disease in the Florida environment from 1999 to 2022
Source: publisher site journal article supplement (doi:10.1515/reveh-2022-0249), 2023-05-06
Supplement: Supplementary file 1 [file j_reveh-2022-0249_suppl_002.docx]

**S1: Internal Study Protocol, Search Strings, and Results by Database**

**Project Lead:** ANB, Coastal One Health and Zoonoses Lab (COHZ lab), Department of Public Health, University of North Florida

**Team Members:** MC with previous assistance from AF, SL, JY, and KA

**Review Date:**

- Initial search conducted in April 2020 to coincide with complimentary One Health studies of:
  - Reported **human** cases of water-related disease and toxins in Florida from 2009-2019
    - Rhoden, K., Alonso, J., Carmona, M., Pham, M., & Barnes, A. N. (2021). Twenty years of waterborne and related disease reports in Florida, USA. *One Health*, *13*, 100294.
  - Published studies of water-related disease and toxins in Florida’s **animals** from 2009-2019
    - Jenkins, M., Ahmed, S., & Barnes, A. N. (2021). A systematic review of waterborne and water-related disease in animal populations of Florida from 1999–2019. *PloS one*, *16*(7), e0255025.
- Final search in March 2022 for additional titles
  - MC, KA, and ANB

**Final Analysis of Included Studies Date:** October 2022

**Research Question:**

1. Which waterborne diseases, water-based toxins and toxin-producers, and water-related vector-borne diseases of public health importance were reported in **environmental samples** of Florida between 1999 and 2022?
   1. Original search in April 2020 for titles published from January 1, 1999- December 31, 2019; Updated search in March 2022 for titles published from December 31, 2019-March 8, 2022

- INCLUSION CRITERIA
  - Waterborne diseases from our approved list of pathogens*
  - Water-related vector-borne diseases from our approved list of pathogens*
  - Water-related toxins from our approved list of pathogens*
  - Published reports/cases/studies that were done in Florida environmental reservoirs or using Florida **environmental samples** (i.e. soil, food, water, air, vectors)
  - Published journal articles from January 1, 1999, through December 31, 2019
    - Also published journal articles from December 31, 2019-March 8, 2022
  - Language must be English (plus any other languages our research lab can cover!)
  - Positive results/findings of at least one of our water-related pathogens or toxins of interest
- EXCLUSION CRITERIA
  - Pathogens or diseases that are not on our approved list and are not water-related
  - Waterborne diseases, water-related vector-borne diseases, or water-related toxins and toxin-producers that are not part of our approved list*
  - Pathogens/diseases/toxins that are not infectious
  - Book chapters, conference proceedings, websites/blogs, poster presentations, letters to the editors, thesis/dissertations that are not published, etc.
  - Journal articles published before January 1, 1999, or after March 8, 2022
  - Journal articles published in any language other than English (and any other additional language our research staff can read/write fluently)
  - Studies based on samples collected outside of Florida or the date range above
  - Experimental studies
  - Studies using secondary data or broad reviews
  - Null results
  - Environmental samples were of human or animal origin only (ex. tissue or feces)

**Pathogens for inclusion*

1. *Amebic encephalitis*
2. *Arboviral diseases not otherwise listed*
3. *California serogroup virus disease*
4. *Campylobacteriosis*
5. *Chikungunya fever*
6. *Cholera (Vibrio cholerae type O1)*
7. *Ciguatera fish poisoning*
8. *Cryptosporidiosis*
9. *Cyclosporiasis*
10. *Dengue fever*
11. *Eastern equine encephalitis*
12. *Escherichia coli infection, Shiga toxin producing*
13. *Giardiasis*
14. *Hepatitis A*
15. *Hepatitis E*
16. *Legionellosis*
17. *Leptospirosis*
18. *Malaria*
19. *Melioidosis*
20. *Neurotoxic shellfish poisoning*
21. *Poliomyelitis*
22. *St. Louis encephalitis*
23. *Salmonellosis*
24. *Saxitoxin poisoning (paralytic shellfish poisoning)*
25. *Shigellosis*
26. *Tularemia*
27. *Typhoid fever (Salmonella serotype Typhi)*
28. *Venezuelan equine encephalitis*
29. *Vibriosis (Vibrio species and closely related organisms, not Vibrio cholerae type O1)*
30. *Viral hemorrhagic fevers*
31. *West Nile virus disease*
32. *Yellow fever*
33. *Zika fever*

**Databases for Search:**

- ABI/INFORM Collection
- Agricola
- Agriculture Collection
- Aquatic Sciences Collection
- Biological Sciences
- BioOne Complete
- Environment Complete
- Agricultural and Environmental Science Collection
- Environmental Studies and Policy
- Google Scholar
- Health and Medicine
- MEDLINE
- Nursing and Allied Health Outcomes
- PubMed
- SAGE Journals
- Science Direct
- SpringerLink Journal
- TOXLINE
- Web of Science Core Collection

**Screening Process:**

1. Gather all available publications from the databases listed below
2. Keep track of every step of the screening process by using a spreadsheet with titles, their inclusion criteria, their exclusion criteria, etc.
3. Working in pairs, screen the titles and abstracts for eligibility

- Any questionable or unsure titles should be retained
- Titles that do not contain an abstract should be retained

1. Retrieve the full-text version of all titles that have not been excluded
2. Each accessible full-text manuscript should be read in its entirety to look for the inclusion criteria above

- This will be done in pairs but each member will read the articles and provide their decision
- If the title does not meet these qualifications, a specific reason should be given (ex. study samples did not originate in Florida)
- If there is not consensus between the pair, the lead researcher (ANB) will be the tiebreaker

1. A quality control check of the excluded titles will be done by ANB before final inclusion of studies in analysis

| **Database** | **Search String** | **Results** | **Results 3/8/2022** |
| --- | --- | --- | --- |
| ABI/INFORM Collection  Searched 4/2/20 | ab("waterborne disease" OR "water-based vector" OR "water-related toxin" OR "Amebic encephalitis" OR "Naegleria fowleri" OR "Primary amebic meningoencephalitis" OR arbovir* OR "California serogroup" OR "Jamestown Canyon" OR "Snowshoe Hare Virus" OR "La Crosse Virus" OR Campylobacter* OR Chickungunya OR Cholera OR "Vibrio cholerae" OR Ciguatera OR Cryptosporidi* OR Cyclospor* OR Dengue OR "Eastern Equine Encephalitis" OR "Escherichia coli" OR "Shiga Toxin" OR STEC OR Giardi* OR "Hepatitis A" OR "Hepatitis E" OR Legionell* OR Leptospir* OR Weil OR Malaria* OR Melioidosis OR Whitmore* OR "Burkholderia pseudomallei" OR "Neurotoxic Shellfish Poisoning" OR Brevetoxin* OR Polio* OR "Saint Louis Encephalitis" OR Salmonell* OR Saxitoxin OR "Paralytic Shellfish" OR Shigell* OR Tularemia OR "Typhoid" OR "Venezuelan Equine Encephalitis" OR Vibrio* OR "Viral Hemorrhagic" OR "Viral Haemorrhagic" OR "West Nile" OR "Yellow Fever" OR Zika) AND ab(Florid* OR "Southeastern United States")    **FILTERS:** Date: From January 01 1999 to December 31 2019; scholarly journals; English Only | 96 | 10  **FILTERS:** Date: From December 31 2019 to March 8, 2022; scholarly journals; English Only |
| Agricola  Searched 4/2/20 | Ab,ti(("waterborne disease" OR "water-based vector" OR "water-related toxin" OR "Amebic encephalitis" OR "Naegleria fowleri" OR "Primary amebic meningoencephalitis" OR arbovir* OR "California serogroup" OR "Jamestown Canyon" OR "Snowshoe Hare Virus" OR "La Crosse Virus" OR Campylobacter* OR Chickungunya OR Cholera OR "Vibrio cholerae" OR Ciguatera OR Cryptosporidi* OR Cyclospor* OR Dengue OR "Eastern Equine Encephalitis" OR "Escherichia coli" OR "Shiga Toxin" OR STEC OR Giardi* OR "Hepatitis A" OR "Hepatitis E" OR Legionell* OR Leptospir* OR Weil OR Malaria* OR Melioidosis OR Whitmore* OR "Burkholderia pseudomallei" OR "Neurotoxic Shellfish Poisoning" OR Brevetoxin* OR Polio* OR "Saint Louis Encephalitis" OR Salmonell* OR Saxitoxin OR "Paralytic Shellfish" OR Shigell* OR Tularemia OR "Typhoid" OR "Venezuelan Equine Encephalitis" OR Vibrio* OR "Viral Hemorrhagic" OR "Viral Haemorrhagic" OR "West Nile" OR "Yellow Fever" OR Zika) AND (Florid* OR "Southeastern United States"))    **FILTERS:** Date: From January 01 1999 to December 31 2019; scholarly journals; English Only | 30 | 49  **FILTERS:** Date: From December 31 2019 to March 8, 2022; scholarly journals; English Only |
| Agriculture Collection  Searched 4/8/20 | Keyword: "water borne" OR  Keyword: "waterborne diseases" OR  Keyword: water-based vector OR  Keyword: water-related toxin AND  Keyword: florid*OR  Keyword: "southeastern united states"    **FILTERS:** Date : Jan 01, 1999 - Dec 31, 2019 Sorted by: Academic Journals | 896 *(only 872 exported)* | 36  **FILTERS:** Date : Dec 31, 2019-Mar 8 2022 Sorted by: Academic Journals |
| Aquatic Sciences Collection  Searched 4/2/20 | AB,TI(("waterborne disease" OR "water-based vector" OR "water-related toxin" OR "Amebic encephalitis" OR "Naegleria fowleri" OR "Primary amebic meningoencephalitis" OR arbovir* OR "California serogroup" OR "Jamestown Canyon" OR "Snowshoe Hare Virus" OR "La Crosse Virus" OR Campylobacter* OR Chickungunya OR Cholera OR "Vibrio cholerae" OR Ciguatera OR Cryptosporidi* OR Cyclospor* OR Dengue OR "Eastern Equine Encephalitis" OR "Escherichia coli" OR "Shiga Toxin" OR STEC OR Giardi* OR "Hepatitis A" OR "Hepatitis E" OR Legionell* OR Leptospir* OR Weil OR Malaria* OR Melioidosis OR Whitmore* OR "Burkholderia pseudomallei" OR "Neurotoxic Shellfish Poisoning" OR Brevetoxin* OR Polio* OR "Saint Louis Encephalitis" OR Salmonell* OR Saxitoxin OR "Paralytic Shellfish" OR Shigell* OR Tularemia OR "Typhoid" OR "Venezuelan Equine Encephalitis" OR Vibrio* OR "Viral Hemorrhagic" OR "Viral Haemorrhagic" OR "West Nile" OR "Yellow Fever" OR Zika) AND (Florid* OR "Southeastern United States"))    **FILTERS:** Date: From January 01 1999 to December 31 2019; scholarly journals only; English only | 213 | 30  **FILTERS:** Date: From December 31 2019 to March 8, 2022; scholarly journals only; English only |
| Biological Sciences  Searched 4/8/20 | **AB,TI**(("waterborne disease" OR "water-based vector" OR "water-related toxin" OR "Amebic encephalitis" OR "Naegleria fowleri" OR "Primary amebic meningoencephalitis" OR arbovir* OR "California serogroup" OR "Jamestown Canyon" OR "Snowshoe Hare Virus" OR "La Crosse Virus" OR Campylobacter* OR Chickungunya OR Cholera OR "Vibrio cholerae" OR Ciguatera OR Cryptosporidi* OR Cyclospor* OR Dengue OR "Eastern Equine Encephalitis" OR "Escherichia coli" OR "Shiga Toxin" OR STEC OR Giardi* OR "Hepatitis A" OR "Hepatitis E" OR Legionell* OR Leptospir* OR Weil OR Malaria* OR Melioidosis OR Whitmore* OR "Burkholderia pseudomallei" OR "Neurotoxic Shellfish Poisoning" OR Brevetoxin* OR Polio* OR "Saint Louis Encephalitis" OR Salmonell* OR Saxitoxin OR "Paralytic Shellfish" OR Shigell* OR Tularemia OR "Typhoid" OR "Venezuelan Equine Encephalitis" OR Vibrio* OR "Viral Hemorrhagic" OR "Viral Haemorrhagic" OR "West Nile" OR "Yellow Fever" OR Zika) AND (Florid* OR "Southeastern United States"))    **FILTERS:** Date: From January 01 1999 to December 31 2019; scholarly journals only; English | 1,292 | 178  **FILTERS:** Date: From December 31 2019 to March 8, 2022; scholarly journals only; English only |
| BioOne Complete  Searched 4/2/20 | ABSTRACT:([[“waterborne disease”] OR [“water-based vector”] OR [“water-related toxin”] OR [“Amebic encephalitis”] OR [“Naegleria fowleri”] OR [“Primary amebic meningoencephalitis”] OR [arbovir*] OR [“California serogroup”] OR [“Jamestown Canyon”] OR [“Snowshoe Hare Virus”] OR [“La Crosse Virus”] OR [Campylobacter] OR [Chickungunya] OR [Cholera] OR [“Vibrio cholerae”] OR [Ciguatera] OR [Cryptosporidi*] OR [Cyclospor*] OR [Dengue] OR [“Eastern Equine Encephalitis”] OR [“Escherichia coli”] OR [“Shiga Toxin”] OR [STEC] OR [Giardi*] OR [“Hepatitis A”] OR [“Hepatitis E”] OR [Legionell*] OR [Leptospir*] OR [Weil] OR [Malaria*] OR [Melioidosis] OR [Whitmore*] OR [“Burkholderia pseudomallei”] OR [“Neurotoxic Shellfish Poisoning”] OR [Brevetoxin*] OR [Polio*] OR [“Saint Louis Encephalitis”] OR [Salmonell*] OR [Saxitoxin] OR [“Paralytic Shellfish”] OR [Shigell*] OR [Tularemia] OR [Typhoid] OR [“Venezuelan Equine Encephalitis”] OR [Vibrio*] OR [“Viral Hemorrhagic”] OR [“Viral Haemorrhagic”] OR [“West Nile”] OR [“Yellow Fever”] OR [Zika]])    **FILTERS:** Date: 1999-2019 (*No location in first search string*) | 77 | 58  **FILTERS:** Date: 2019-2022 (*No location in first search string*) |
| Environment Complete  Searched 4/2/20 | AB((waterborne disease OR water-based vector OR water-related toxin) AND (Amebic encephalitis OR Naegleria fowleri OR Primary amebic meningoencephalitis OR arbovir* OR California serogroup OR Jamestown Canyon OR Snowshoe Hare Virus OR “La Crosse Virus” OR Campylobacter OR Chickungunya OR Cholera OR Vibrio cholerae OR Ciguatera OR Cryptosporidi* OR Cyclospor* OR Dengue OR Eastern Equine Encephalitis OR Escherichia coli OR Shiga Toxin OR STEC OR Giardi* OR Hepatitis A OR Hepatitis E OR Legionell* OR Leptospir* OR Weil OR Malaria* OR Melioidosis OR Whitmore* OR Burkholderia pseudomallei OR Neurotoxic Shellfish Poisoning OR Brevetoxin* OR Polio* OR Saint Louis Encephalitis OR Salmonell* OR Saxitoxin OR Paralytic Shellfish OR Shigell* OR Tularemia OR Typhoid OR Venezuelan Equine Encephalitis OR Vibrio* OR Viral Hemorrhagic OR Viral Haemorrhagic OR West Nile OR Yellow Fever OR Zika) AND (Florid* OR “Southeastern United States”))    **FILTERS:** Date: From January 1999 to December  2019; academic journals only; | 597 | 1  **FILTERS:** Date: From December  2019 to March 2022; academic journals only; |
| Agricultural and Environmental Science Collection  Searched 4/8/20 | **AB,TI**((waterborne disease OR water-based vector OR water-related toxin) AND (Amebic encephalitis OR Naegleria fowleri OR Primary amebic meningoencephalitis OR arbovir* OR California serogroup OR Jamestown Canyon OR Snowshoe Hare Virus OR "La Crosse Virus" OR Campylobacter OR Chickungunya OR Cholera OR Vibrio cholerae OR Ciguatera OR Cryptosporidi* OR Cyclospor* OR Dengue OR Eastern Equine Encephalitis OR Escherichia coli OR Shiga Toxin OR STEC OR Giardi* OR "Hepatitis A" OR "Hepatitis E" OR Legionell* OR Leptospir* OR Weil OR Malaria* OR Melioidosis OR Whitmore* OR Burkholderia pseudomallei OR Neurotoxic Shellfish Poisoning OR Brevetoxin* OR Polio* OR "Saint Louis Encephalitis" OR Salmonell* OR Saxitoxin OR Paralytic Shellfish OR Shigell* OR Tularemia OR Typhoid OR "Venezuelan Equine Encephalitis" OR Vibrio* OR Viral Hemorrhagic OR Viral Haemorrhagic OR West Nile OR Yellow Fever OR Zika) AND (Florid* OR "Southeastern United States"))    **FILTERS:** Date: From January 01 1999 to December 31 2019; scholarly journals only; English only | 1 | 4  **FILTERS:** Date: From December 31 2019 to March 8 2022; scholarly journals only; English only |
| Environmental Studies and Policy  Searched 4/8/20 | Keyword: "water borne" OR  Keyword: "waterborne diseases" OR  Keyword: “water-based vector” OR  Keyword: “water-related toxin” AND  Keyword: “Florida” OR  Keyword: “floridian” OR  Keyword: "southeastern united states"    **FILTERS:** Peer-Reviewed Journal: Document type= Article; Date : Jan 01, 1999 - Dec 31, 2019 | 477 | 30  **FILTERS:** Peer-Reviewed Journal: Document type= Article; Date : Dec 31, 2019- Mar 8 2022 |
| Google Scholar  Searched 4/8/20 | all abstract: ("waterborne disease" OR "water-based vector" OR "water-related toxin") AND (Florida OR Floridian OR “Southeastern United States”)    **FILTERS:** Date range: 1999-2019; Filter- do not include citations; do not include patents; English Pages only | 1,930  *(only 1,280 exported)* | 421  **FILTERS:** Date range: 2019-2022; Filter- do not include citations; do not include patents; English Pages only |
| Health and Medicine  Searched 4/3/20 | ab(((waterborne disease OR water-based vector OR water-related toxin) AND (Amebic encephalitis OR Naegleria fowler OR Primary amebic meningoencephalitis OR arbovir* OR California serogroup OR Jamestown Canyon OR Snowshoe Hare Virus OR La Crosse Virus OR Campylobacter OR Chickungunya OR Cholera OR Vibrio cholera OR Ciguatera OR Cryptosporidi* OR Cyclospor* OR Dengue OR Eastern Equine Encephalitis OR Escherichia coli OR Shiga Toxin OR STEC OR Giardi* OR Hepatitis A OR Hepatitis E OR Legionell* OR Leptospir* OR Weil OR Malaria* OR Melioidosis OR Whitmore* OR Burkholderia pseudomallei OR Neurotoxic Shellfish Poisoning OR Brevetoxin* OR Polio* OR Saint Louis Encephalitis OR Salmonell* OR Saxitoxin OR Paralytic Shellfish OR Shigell* OR Tularemia OR Typhoid OR Venezuelan Equine Encephalitis OR Vibrio* OR Viral Hemorrhagic OR Viral hemorrhagic OR West Nile OR Yellow Fever OR Zika) AND (Florid* OR "Southeastern United States")))    **FILTERS:** Date: From January 01 1999 to December 31 2019; English only | 1 | 2  **FILTERS:** Date: From to December 31 2019 to March 8 2022; English only |
| MEDLINE  Searched 4/3/20 | ab(((waterborne disease OR water-based vector OR water-related toxin) AND (Amebic encephalitis OR Naegleria fowler OR Primary amebic meningoencephalitis OR arbovir* OR California serogroup OR Jamestown Canyon OR Snowshoe Hare Virus OR La Crosse Virus OR Campylobacter OR Chickungunya OR Cholera OR Vibrio cholera OR Ciguatera OR Cryptosporidi* OR Cyclospor* OR Dengue OR Eastern Equine Encephalitis OR Escherichia coli OR Shiga Toxin OR STEC OR Giardi* OR Hepatitis A OR Hepatitis E OR Legionell* OR Leptospir* OR Weil OR Malaria* OR Melioidosis OR Whitmore* OR Burkholderia pseudomallei OR Neurotoxic Shellfish Poisoning OR Brevetoxin* OR Polio* OR Saint Louis Encephalitis OR Salmonell* OR Saxitoxin OR Paralytic Shellfish OR Shigell* OR Tularemia OR Typhoid OR Venezuelan Equine Encephalitis OR Vibrio* OR Viral Hemorrhagic OR Viral hemorrhagic OR West Nile OR Yellow Fever OR Zika) AND (Florid* OR "Southeastern United States")))    **FILTERS:** Date: From January 01 1999 to December 31 2019 | 0 | 2  **FILTERS:** Date: From December 31 2019 to March 8 2022 |
| Nursing and Allied Health Outcomes  Searched 4/8/20 | Keyword: "water borne" OR  Keyword: "waterborne diseases" OR  Keyword: “water-based vector” OR  Keyword: “water-related toxin” AND  Keyword: “florida” OR  Keyword: “floridian” OR  Keyword: "southeastern united states"    **FILTERS:** Peer-Reviewed; Date : Jan 01, 1999 - Dec 31, 2019 | 830  (only 812 exported) | 170  **FILTERS:** Peer-Reviewed; Date : Dec 31, 2019- Mar 8 2022 |
| Pubmed  Searched 4/2/20 | ((((“waterborne disease” [tiab] OR “water-based vector” [tiab] OR “water-related toxin” [tiab] OR "Amebic encephalitis" [tiab] OR “Naegleria fowleri” [tiab] OR “Primary amebic meningoencephalitis” [tiab] OR arbovir* [tiab] OR “California serogroup” [tiab] OR “Jamestown Canyon” [tiab] OR “Snowshoe Hare Virus” [tiab] OR “La Crosse Virus” [tiab] OR Campylobacter* [tiab] OR Chickungunya [tiab] OR Cholera [tiab] OR “Vibrio cholerae” [tiab] OR Ciguatera [tiab] OR Cryptosporidi* [tiab] OR Cyclospor* [tiab] OR Dengue [tiab] OR “Eastern Equine Encephalitis” [tiab] OR “Escherichia coli” [tiab] OR “Shiga Toxin” [tiab] OR STEC [tiab] OR Giardi* [tiab] OR “Hepatitis A” [tiab] OR “Hepatitis E” [tiab] OR Legionell* [tiab] OR Leptospir* [tiab] OR Weil [tiab] OR Malaria* [tiab] OR Melioidosis [tiab] OR Whitmore* [tiab] OR “Burkholderia pseudomallei” [tiab] OR “Neurotoxic Shellfish Poisoning” [tiab] OR Brevetoxin* [tiab] OR Polio* [tiab] OR “Saint Louis Encephalitis” [tiab] OR Salmonell* [tiab] OR Saxitoxin [tiab] OR “Paralytic Shellfish” [tiab] OR Shigell* [tiab] OR Tularemia [tiab] OR “Typhoid” [tiab] OR “Venezuelan Equine Encephalitis” [tiab] OR Vibrio* [tiab] OR “Viral Hemorrhagic” [tiab] OR “Viral Haemorrhagic” [tiab] OR “West Nile” [tiab] OR “Yellow Fever” [tiab] OR Zika [tiab]) AND (Florid* [tiab] OR “Southeastern United States” [tiab]))) AND ( "1999/01/01"[PDat] : "2019/12/31"[PDat] ))    **FILTERS:** English; search sting includes date range | 684 | 131  **FILTERS:** English; search sting includes date range |
| SAGE Journals  Searched 4/2/20 | Search abstracts for these keywords:  (("waterborne disease" OR "water-based vector" OR "water-related toxin" OR "Amebic encephalitis" OR "Naegleria fowleri" OR "Primary amebic meningoencephalitis" OR arbovir* OR "California serogroup" OR "Jamestown Canyon" OR "Snowshoe Hare Virus" OR "La Crosse Virus" OR Campylobacter* OR Chickungunya OR Cholera OR "Vibrio cholerae" OR Ciguatera OR Cryptosporidi* OR Cyclospor* OR Dengue OR "Eastern Equine Encephalitis" OR "Escherichia coli" OR "Shiga Toxin" OR STEC OR Giardi* OR "Hepatitis A" OR "Hepatitis E" OR Legionell* OR Leptospir* OR Weil OR Malaria* OR Melioidosis OR Whitmore* OR "Burkholderia pseudomallei" OR "Neurotoxic Shellfish Poisoning" OR Brevetoxin* OR Polio* OR "Saint Louis Encephalitis" OR Salmonell* OR Saxitoxin OR "Paralytic Shellfish" OR Shigell* OR Tularemia OR "Typhoid" OR "Venezuelan Equine Encephalitis" OR Vibrio* OR "Viral Hemorrhagic" OR "Viral Haemorrhagic" OR "West Nile" OR "Yellow Fever" OR Zika) AND (Florid* OR "Southeastern United States"))    **FILTERS:** Date Range: 1999-2019 | 169 | 59  **FILTERS:** Date Range: 2019-2022 |
| Science Direct  Searched 4/2/20 | Find articles with these terms: (Florida OR Floridian OR "Southeastern United States")  Title, abstract, and keywords: ("water borne" OR "waterborne disease" OR "water-based vector" OR "water-related toxin")    **FILTERS:** Date restrictions: 1999-2019; Article Types: Review Articles, Research Articles, Case Reports, Data Articles, Mini Reviews, Replication Studies | 33 | 10  **FILTERS:** Date restrictions: 2019-2022; Article Types: Review Articles, Research Articles (only options) |
| SpringerLink Journals  Searched 4/8/20 | ("waterborne disease" OR "water-based vector" OR "water-related toxin" OR "Amebic encephalitis" OR "Naegleria fowleri" OR "Primary amebic meningoencephalitis" OR arbovir* OR "California serogroup" OR "Jamestown Canyon" OR "Snowshoe Hare Virus" OR "La Crosse Virus" OR Campylobacter* OR Chickungunya OR Cholera OR "Vibrio OR cholerae" OR Ciguatera OR Cryptosporidi* OR Cyclospor* OR Dengue OR "Eastern Equine Encephalitis" OR "Escherichia coli" OR "Shiga Toxin" OR STEC OR Giardi* OR "Hepatitis A" OR "Hepatitis E" OR Legionell* OR Leptospir* OR Weil OR Malaria* OR Melioidosis OR Whitmore* OR "Burkholderia pseudomallei" OR "Neurotoxic Shellfish Poisoning" OR Brevetoxin* OR Polio* OR "Saint Louis Encephalitis" OR Salmonell* OR Saxitoxin OR "Paralytic Shellfish" OR Shigell* OR Tularemia OR "Typhoid" OR "Venezuelan Equine Encephalitis" OR Vibrio* OR "Viral Hemorrhagic" OR "Viral Haemorrhagic" OR "West Nile" OR "Yellow Fever" OR Zika) AND ((Florid* OR "Southeastern United States")'    **FILTERS:** English only, article only, and between 1999-2019 | 413 | 0  **FILTERS:** English only, article only, and between 2019-2022 |
| TOXLINE  Searched 4/2/20 | AB(("waterborne disease" OR "water-based vector" OR "water-related toxin" OR "Amebic encephalitis" OR "Naegleria fowleri" OR "Primary amebic meningoencephalitis" OR arbovir* OR "California serogroup" OR "Jamestown Canyon" OR "Snowshoe Hare Virus" OR "La Crosse Virus" OR Campylobacter* OR Chickungunya OR Cholera OR "Vibrio cholerae" OR Ciguatera OR Cryptosporidi* OR Cyclospor* OR Dengue OR "Eastern Equine Encephalitis" OR "Escherichia coli" OR "Shiga Toxin" OR STEC OR Giardi* OR "Hepatitis A" OR "Hepatitis E" OR Legionell* OR Leptospir* OR Weil OR Malaria* OR Melioidosis OR Whitmore* OR "Burkholderia pseudomallei" OR "Neurotoxic Shellfish Poisoning" OR Brevetoxin* OR Polio* OR "Saint Louis Encephalitis" OR Salmonell* OR Saxitoxin OR "Paralytic Shellfish" OR Shigell* OR Tularemia OR "Typhoid" OR "Venezuelan Equine Encephalitis" OR Vibrio* OR "Viral Hemorrhagic" OR "Viral Haemorrhagic" OR "West Nile" OR "Yellow Fever" OR Zika) AND (Florid* OR "Southeastern United States"))    **FILTERS:** Date: From January 01 1999 to December 31 2019; scholarly journals only | 112 | 1  **FILTERS:** Date: From December 31 2019 to March 8 2022; scholarly journals only |
| Web of Science Core Collection  Searched 4/2/20 | TS= (("waterborne disease" OR "water-based vector" OR "water-related toxin" OR "Amebic encephalitis" OR "Naegleria fowleri" OR "Primary amebic meningoencephalitis" OR arbovir* OR "California serogroup" OR "Jamestown Canyon" OR "Snowshoe Hare Virus" OR "La Crosse Virus" OR Campylobacter* OR Chickungunya OR Cholera OR "Vibrio cholerae" OR Ciguatera OR Cryptosporidi* OR Cyclospor* OR Dengue OR "Eastern Equine Encephalitis" OR "Escherichia coli" OR "Shiga Toxin" OR STEC OR Giardi* OR "Hepatitis A" OR "Hepatitis E" OR Legionell* OR Leptospir* OR Weil OR Malaria* OR Melioidosis OR Whitmore* OR "Burkholderia pseudomallei" OR "Neurotoxic Shellfish Poisoning" OR Brevetoxin* OR Polio* OR "Saint Louis Encephalitis" OR Salmonell* OR Saxitoxin OR "Paralytic Shellfish" OR Shigell* OR Tularemia OR "Typhoid" OR "Venezuelan Equine Encephalitis" OR Vibrio* OR "Viral Hemorrhagic" OR "Viral Haemorrhagic" OR "West Nile" OR "Yellow Fever" OR Zika) AND (Florid* OR "Southeastern United States"))    **FILTERS:** Timespan=1999-2019; Article or Review; English only | 1,204 | 192  **FILTERS:** Timespan=2019-2022; Article or Review; English only |
|  | **Total** | **9,055** | **1,384** |
|  | **Total Accessible** | **8,363** | **1,384** |
